# Supplementary material
Source: PubMed Central journal article supplement (PMC6648742)
Supplement: ao8b03511_si_001.pdf [file ao8b03511_si_001.pdf]

Supporting Information

# Improved smart microgel carriers for catalytic silver nanoparticles

*Timo Brändel†, Viktor Sabadasch†, Yvonne Hannappel† and Thomas Hellweg†\**

†Department of Physical and Biophysical Chemistry, Bielefeld University, Universitätsstraße  
25, 33615 Bielefeld

\* To whom correspondence should be addressed.

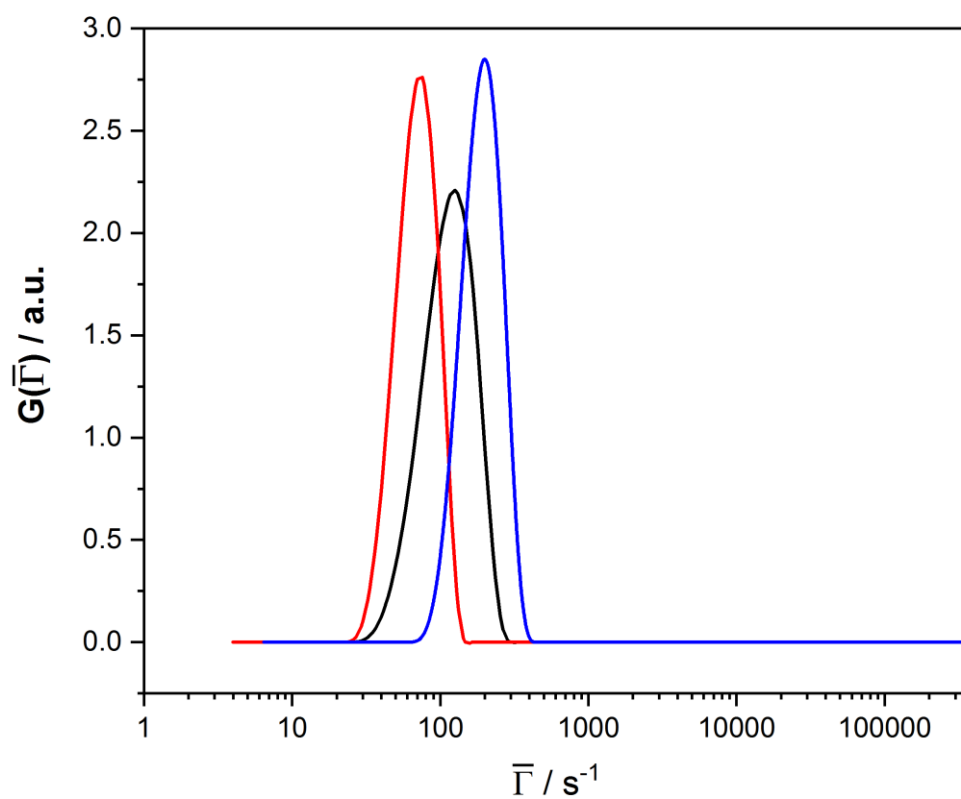

Figure S1: Relaxation rate distribution of the core-shell microgels PNI5@PNN5 (black), PMAM5@PNN (red) and PNN5@PNN (blue).

Table S1: Polydispersity of all core-shell microgels, obtained from the fixed-angle light scattering measurements with the method of cumulants.

| <b>Sample name</b> | <b>PDI / %</b> |
|--------------------|----------------|
| <b>PNI5@PNN</b>    | <b>2.2</b>     |
| <b>PNI10@PNN</b>   | <b>2.5</b>     |
| <b>PNI15@PNN</b>   | <b>3.1</b>     |
| <b>PMAM5@PNN</b>   | <b>7.7</b>     |
| <b>PMAM10@PNN</b>  | <b>14.1</b>    |
| <b>PMAM15@PNN</b>  | <b>8.8</b>     |
| <b>PNN5@PNN</b>    | <b>2.4</b>     |
| <b>PNN10@PNN</b>   | <b>2.8</b>     |
| <b>PNN15@PNN</b>   | <b>2.5</b>     |

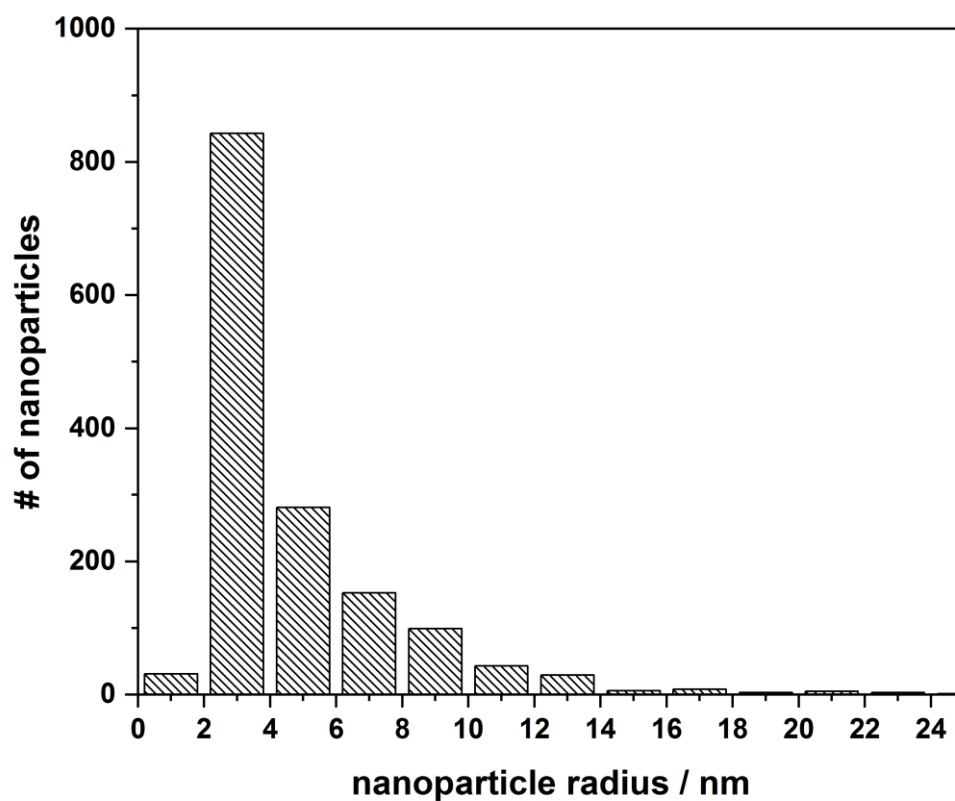

Figure S2: Exemplaric distribution of silver nanoparticle radii inside the sample PNI15@PNN. The distribution was extracted from the dry-state TEM image, which is shown in the publication via analysis with ImageJ.

Table S2: Detailed analysis of AgNP-loading and AgNP size for all microgel/nanoparticle hybrids. The analysis was performed from the dry-state TEM pictures of the samples.

| Sample name | Number of AgNP per Microgel | Mean radius of AgNP / nm |
|-------------|-----------------------------|--------------------------|
| PNI5@PNN    | 73                          | 4.3±0.7                  |
| PNI10@PNN   | 73                          | 6.4±0.2                  |
| PNI15@PNN   | 102                         | 6.0±0.5                  |
| PMAM5@PNN   | 45                          | 12.6±5.1                 |
| PMAM10@PNN  | 103                         | 8.2±2.8                  |
| PMAM15@PNN  | 122                         | 8.3±5.3                  |
| PNN5@PNN    | 42                          | 3.8±0.2                  |
| PNN10@PNN   | 39                          | 4.6±0.4                  |
| PNN15@PNN   | 96                          | 3.3±0.5                  |
